# Supplementary material
Source: HighWire-hosted journal article supplement (http://rc.rcjournal.com/highwire/filestream/16268/field_highwire_adjunct_files/0/suppl.pdf)

Supplementary Fig 1.

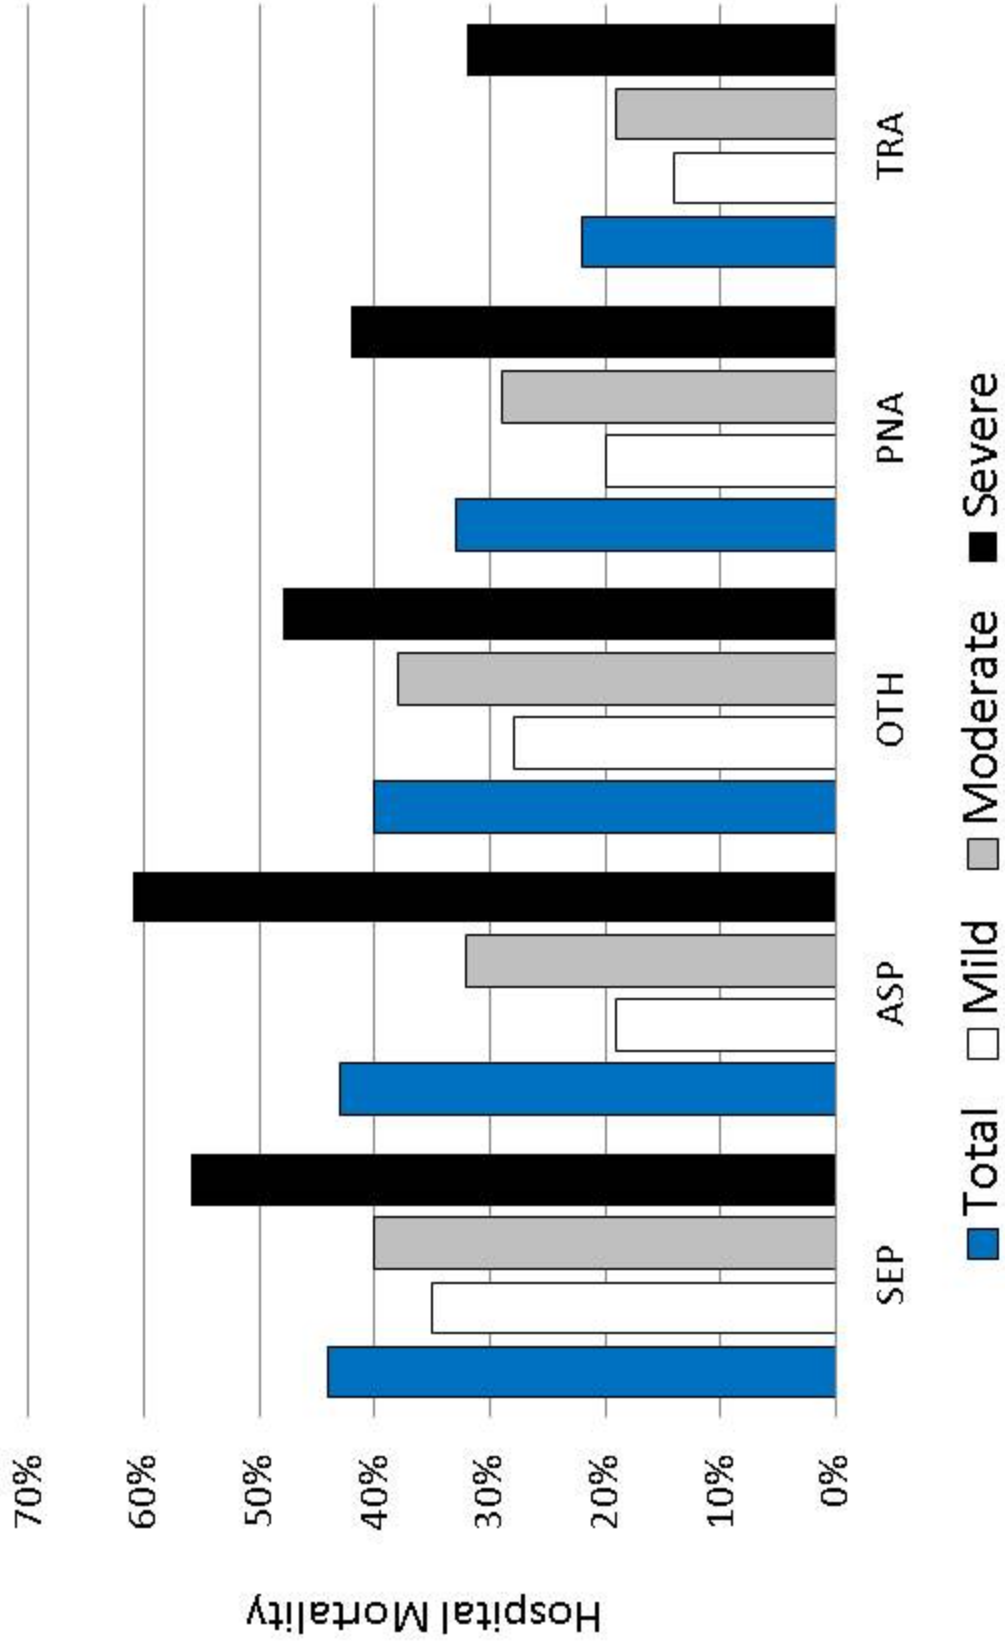

Supplement: suppl.pdf [file suppl.pdf]
